# Supplementary material for: Contrasting effects of intracellular and extracellular human PCSK9 on inflammation, lipid alteration and cell death
Source: PubMed Central journal article supplement (PMC11322528; doi:10.1038/s42003-024-06674-9), 2024-08-13

Figure 3b

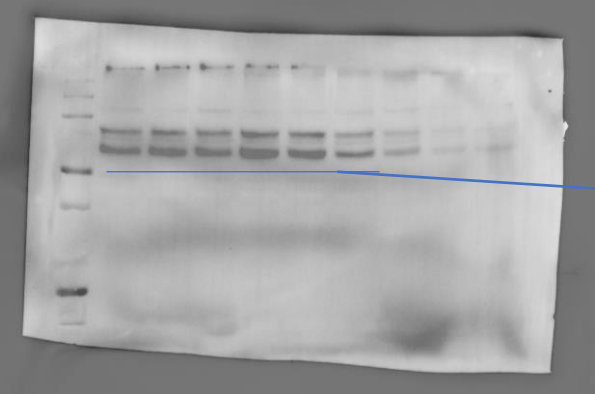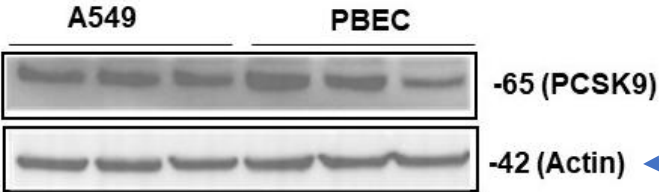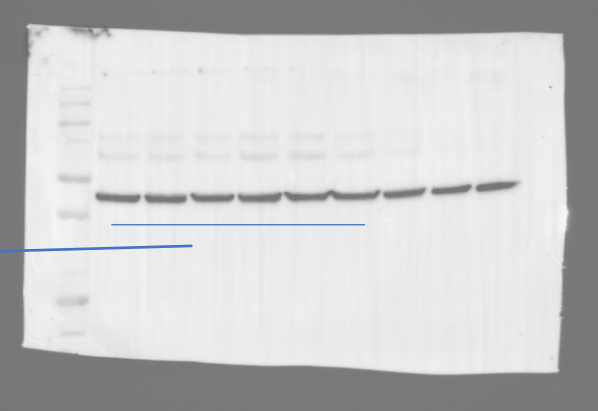

Figure: 3 D

PCSK9

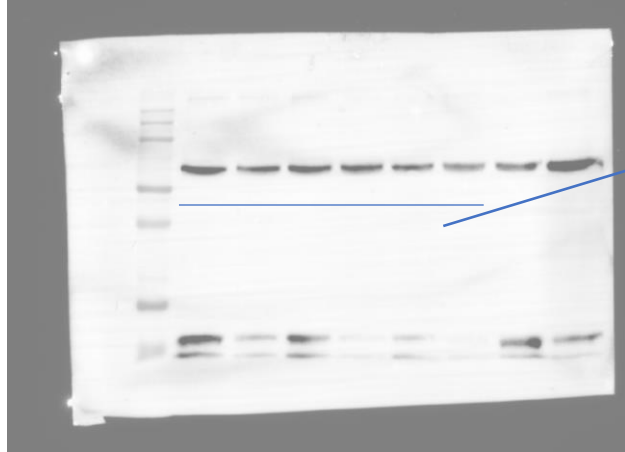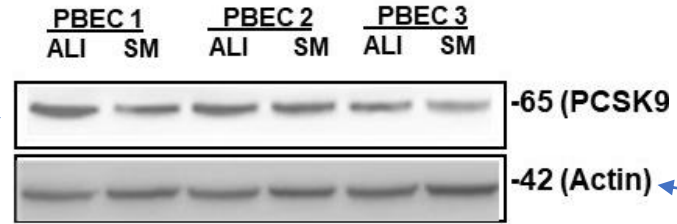

Actin

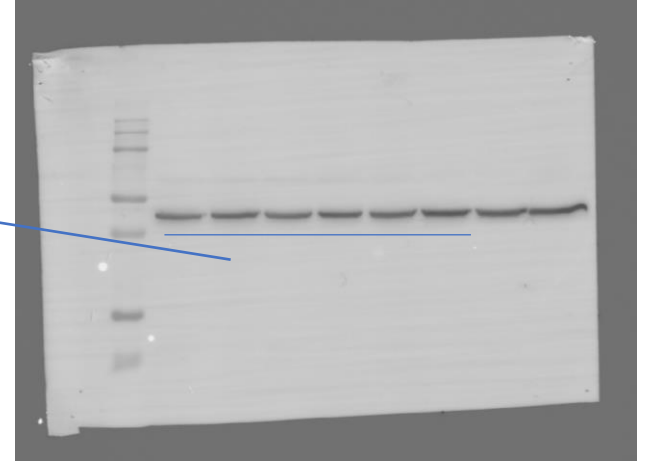

Figure 3e

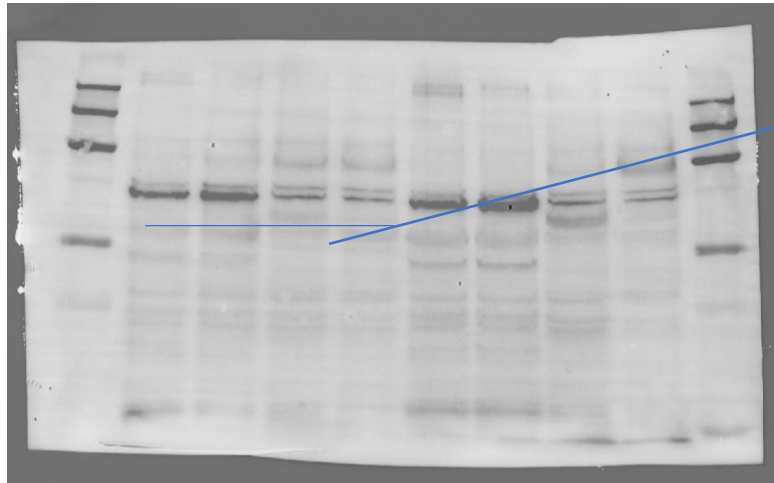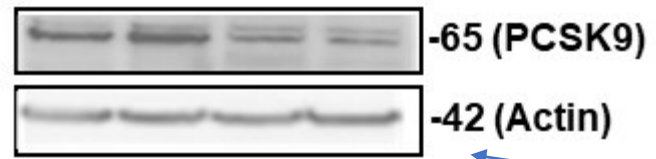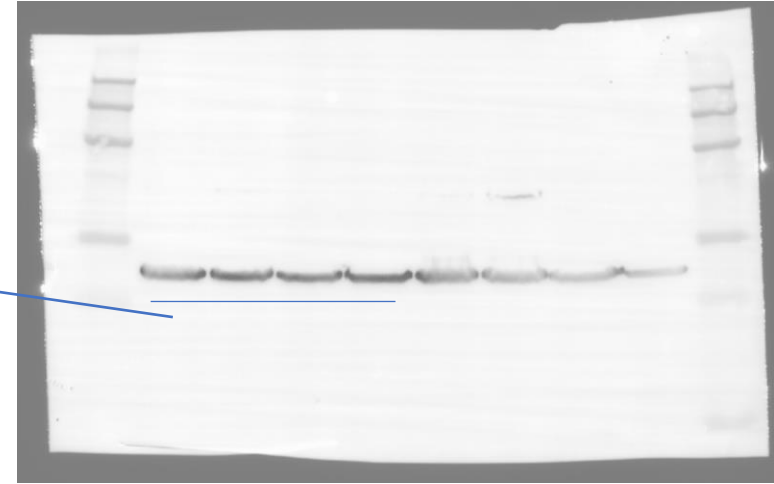

Figure 3i

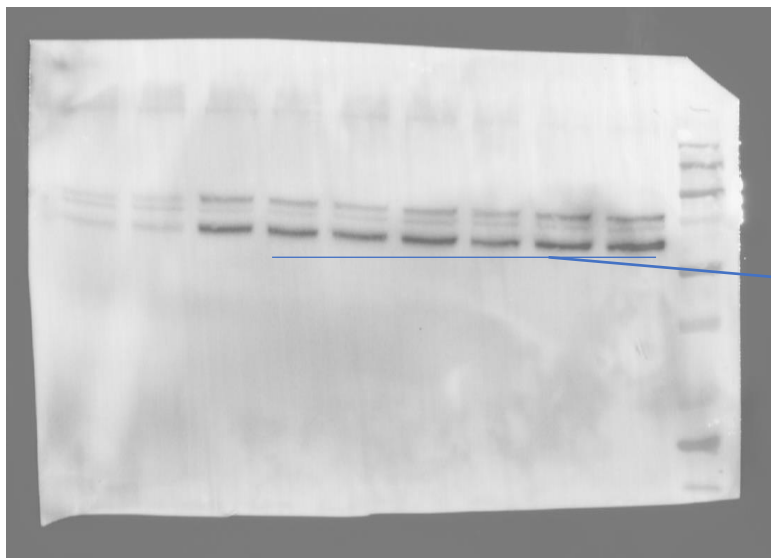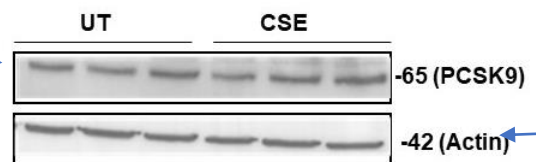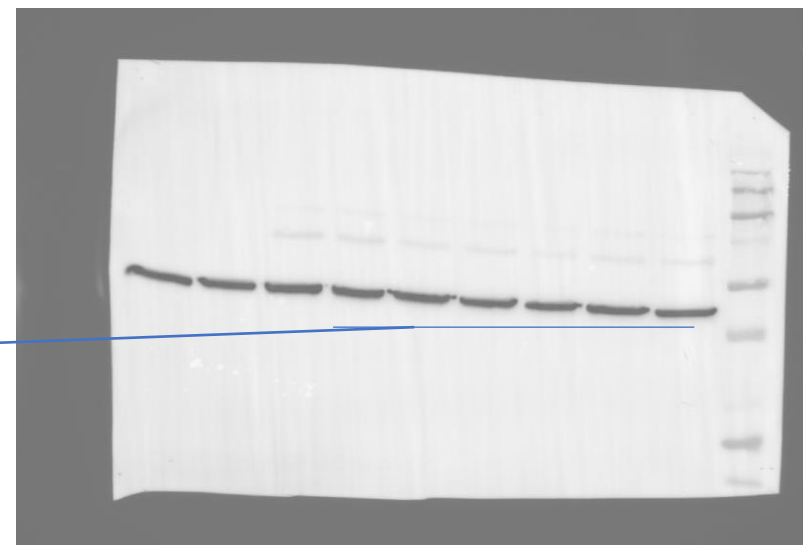

TGFB

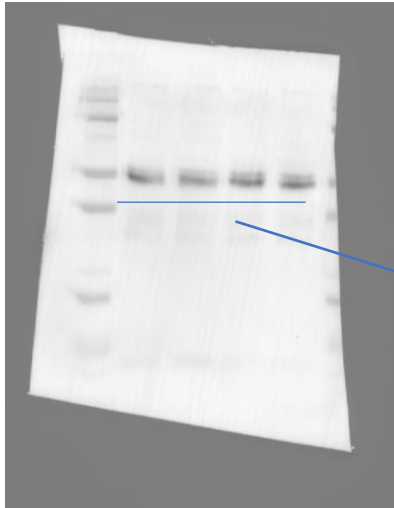

GAPDH

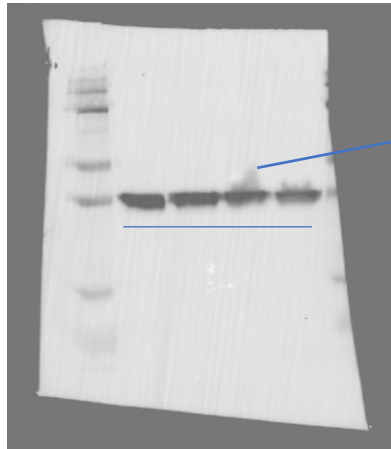

Supp figure 1c

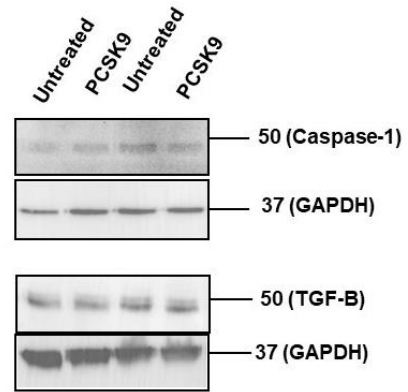

Caspase 1

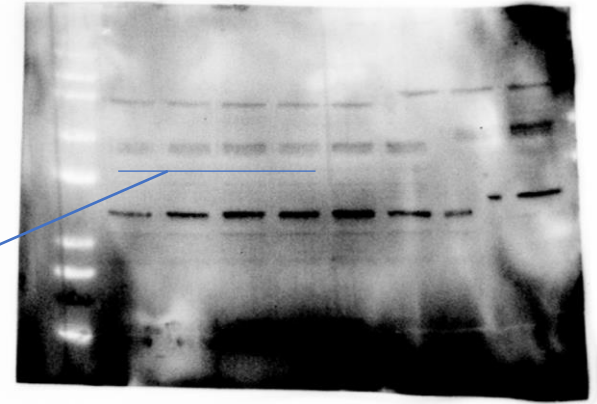

GAPDH

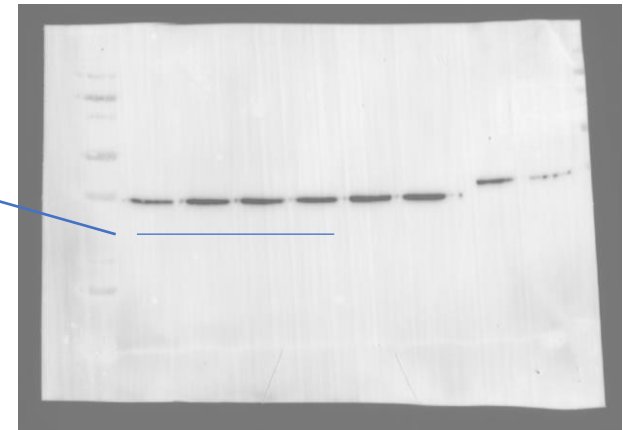

PCSK9

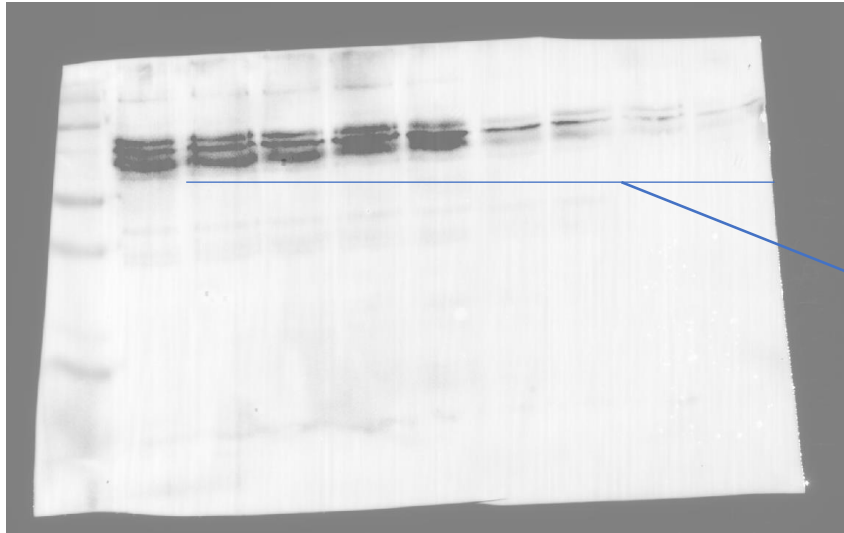

Actin

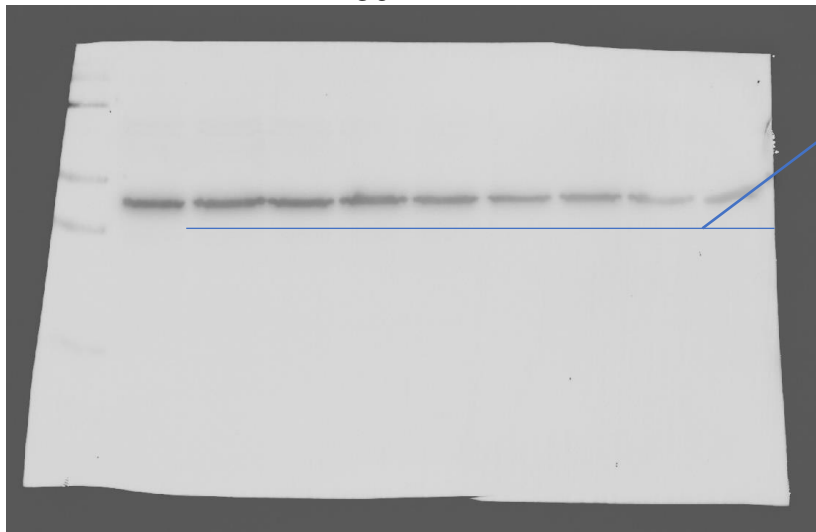

Supp figure 2b

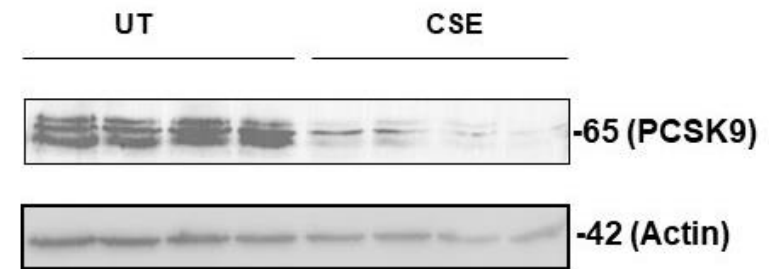

Supp. Figure 3a

PCSK9

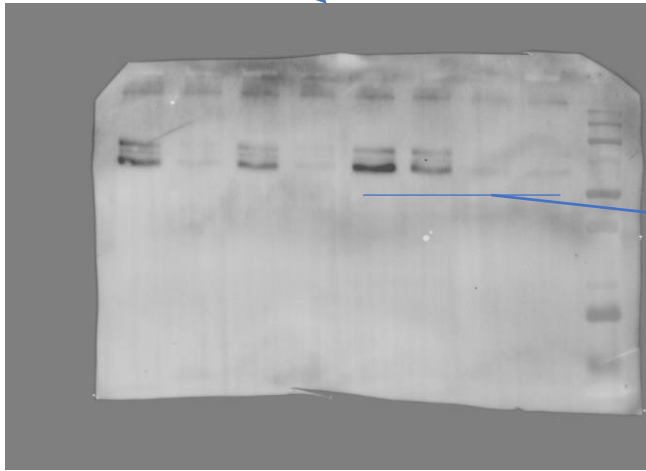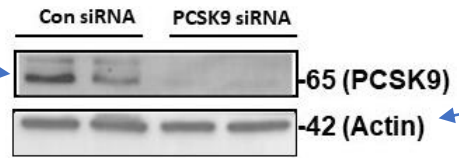

Actin

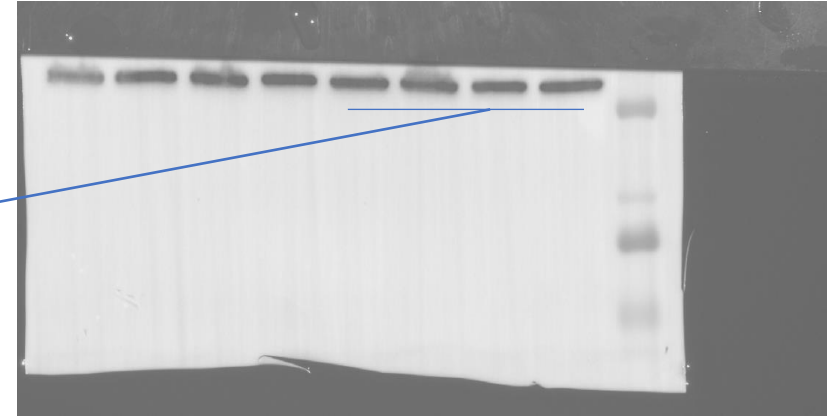

Supplement: 42003_2024_6674_MOESM4_ESM.pdf [file 42003_2024_6674_MOESM4_ESM.pdf]
